# Supplementary material
Source: Springer Nature journal article supplement (https://www.springermedizin.de/resource/supplementary/12879_2007_677_MOESM4_ESM.pdf/9449484)

### Severity

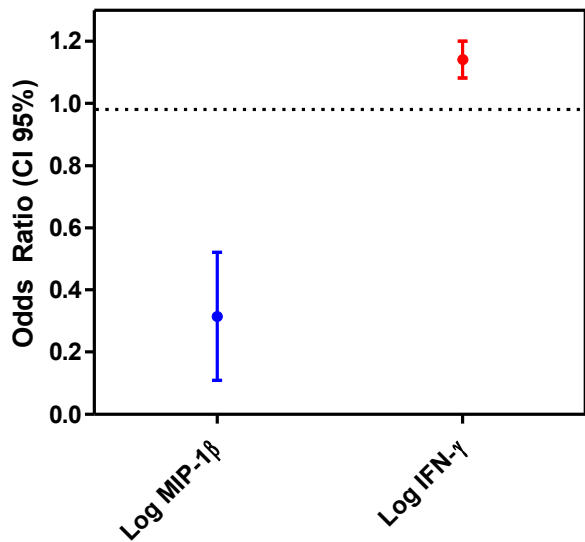

### Thrombocytopenia

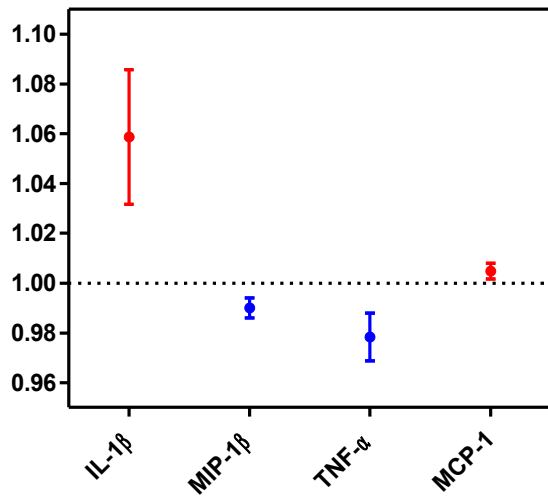

### Hypotension

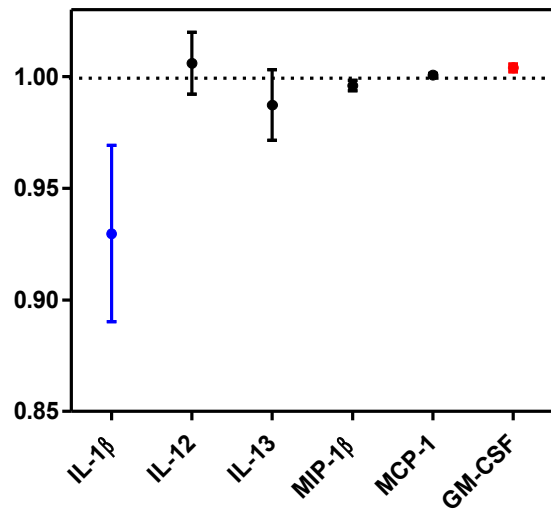

Supplement: MOESM4 [file 9449484]
